# Large-scale neuron cell classification of single-channel and multi-channel extracellular recordings in the anterior lateral motor cortex

Rohan Parikh<sup>a,1</sup>

<sup>a</sup>Janelia Research Campus

October 31, 2018

1 **Identification of neuron cell type helps us connect neural circuitry**  
2 **and behavior; greater specificity in cell type and subtype classifica-**  
3 **tion provides a clearer picture of specific relationships between the**  
4 **brain and behavior. With the advent of high-density probes, large-**  
5 **scale neuron classification is needed, as typical extracellular record-**  
6 **ings are identity-blind to the neurons they record. Current meth-**  
7 **ods for identification of neurons include optogenetic tagging and**  
8 **intracellular recordings, but are limited in that they are expensive,**  
9 **time-consuming, and have a limited scope. Therefore, a more auto-**  
10 **mated, real-time method is needed for large-scale neuron identifica-**  
11 **tion. Data from two recordings was incorporated into this research;**  
12 **the single-channel recording included data from three neuron types**  
13 **in the motor cortex: FS, IT, and PT neurons. The multi-channel**  
14 **recording contained data from two neuron subtypes also in the mo-**  
15 **tor cortex: PT\_L and PT\_U neurons. This allowed for an examina-**  
16 **tion of both general neuron classification and more specific subtype**  
17 **classification, which was done via artificial neural networks (ANNs)**  
18 **and machine learning (ML) algorithms. For the single-channel neu-**  
19 **ron classification, the ANNs achieved 91% accuracy, while the ML**  
20 **algorithms achieved 98% accuracy, using the raw electrical wave-**  
21 **form. The multi-channel classification, which was significantly more**  
22 **difficult due to the similarity between the neuron types, yielded an**  
23 **ineffective ANN, reaching 68% accuracy, while the ML algorithms**  
24 **reached 81% using 8 calculated features from the waveform. Thus, to**  
25 **distinguish between different neuron cell types and subtypes in the**  
26 **motor cortex, both ANNs and specific ML algorithms can facilitate**  
27 **rapid and accurate near real-time large-scale classification.**

neuron classification | extracellular recordings | artificial neural networks  
| anterior lateral motor cortex

1 **B**rain and neuron activity may be visualized in two ways;  
2 observing neuron activity optically is useful, but its scope  
3 is limited solely to the surface of the brain. However, silicon  
4 probes have emerged as a more effective way of observing brain  
5 activity, especially the recently pioneered Neuropixel probe  
6 (1).

7 This activity correlates to particular neurons, specifically  
8 in the anterior lateral motor cortex for this research, which  
9 are classified as regular spiking (RS) and fast spiking (FS). RS  
10 neurons can be further broken down into excitatory putative  
11 pyramidal tract (PT) neurons and inhibitory layer 5 intrate-  
12 lencephalic (IT) neurons; meanwhile, FS GABAergic neurons  
13 are inhibitory (2). These L5 PT neurons in the motor cortex  
14 may be subdivided into PT\_L & PT\_U neurons, further sub-  
15 types in which preparatory activity to motor commands has  
16 been observed to indicate these neurons as having specialized  
17 distinct roles in motor control.

18 Currently, the electrophysiological data generated using

19 Neuropixel probes from neuron cells is simply the general  
20 background electrical activity of the brain with occasional  
21 spikes from neurons firing. These spike waveforms have unique  
22 characteristics derived from the specific neurons they originate  
23 from, which are used to sort these spikes into various clusters.  
24 This clustering has been attempted using a swath of different  
25 techniques, including thresholding, feature extraction, and  
26 template-matching, and frequently require human correction  
27 due a semi-automated methodology. These issues are prevalent  
28 in nearly all spike sorting techniques that have been used on  
29 tetrodes and smaller-scale electrode arrays, along with those  
30 that have been built specifically for large-scale dense electrode  
31 arrays. These include Kilosort (3), Klusta (4), JRClust (5),  
32 M-Sorter (6), YASS (7), MountainSort (8), SpyKING CIR-  
33 CUS (9), FAST (10), and various other unnamed algorithmic  
34 methods (11). Many of these algorithms claim full automation,  
35 but in reality require human correction to some degree (12).

36 Thus, in order to accurately classify neurons, biological  
37 imaging, sequencing techniques, or intracellular recording is  
38 generally required. Optogenetic tagging is a bio-imaging tech-  
39 nique in which a firing neuron is tagged in order to identify it.  
40 While this process is useful in identifying the specific neuron  
41 type responsible for firing to perform a behavior, it is time-  
42 consuming and is limited to single neurons, making it infeasible  
43 for large-scale classification (13). Single-cell RNA-sequencing  
44 using comprehensive transcriptome analysis is another bio-  
45 logical technique to classify neuron types, but again, it is  
46 time-consuming and requires individualized analysis of single

## Significance Statement

Identification of neuron type helps understand the connection between neural circuitry and behavior. With the advent of high-density probes, large-scale neuron classification is needed, as typical extracellular recordings are identity-blind to the neurons they record. The purpose of this research was to determine the viability of neuron classification via artificial neural networks and machine learning, and evaluate the hyperparameter and feature selection for such classification. The study yielded specific hyperparameters and features for certain algorithms and networks that consistently provide extremely high accuracies to serve as a basis for further classification without excessive optotagging and intracellular recordings.

The author has declared that no competing interests exist.

Present address: 19700 Helix Drive, Ashburn VA, 20147

<sup>1</sup> To whom correspondence should be addressed. E-mail: rohan.parikh@hotmail.com

47 neurons (14). Neuron classification of hypothalamic supraoptic neurons in rats has used an electrophysiological approach  
48 through firing patterns, but also generally requires immunochemical labeling unless the patterns are in phasic bursting  
49 (15).  
50  
51

52 Intracellular recording utilizes a patch clamp to measure  
53 the electrical activity within one neuron, providing the ground-truth data between spike waveform and cell type; however, this  
54 is limited to singular neurons and is not representative of the surrounding electrical activity. In comparison, extracellular  
55 recordings allow for the recording of many neuron cells firing; however, this introduces the trade-off in which spikes can be  
56 clustered but not identified (16). Accurate neuron classification into three classes of mouse cortical neurons and rat dorsal root  
57 ganglia has been achieved using intracellular recordings, and classification into four classes of cat primary visual cortical  
58 neurons has also been achieved with intracellular recordings, but these methods do not account for interference of electrical  
59 activity in the brain, seen in extracellular recordings, and is not automated due to non-software-based clustering such  
60 as parameter extraction (17) (18) (19). Current methods have also utilized both RNA-seq and single-cell patch-clamp  
61 (intracellular) protocols to identify neuronal subtypes, but also have a limited scope (20).  
62  
63  
64  
65  
66  
67  
68  
69  
70

71 Other waveform classification algorithms may also be algorithmic and software-based, but have their own limitations.  
72 One method utilized manual K-means clustering to perform real-time classification, but was limited in that it solely used 8  
73 time points in the waveform and was limited to 30 electrodes. Manual algorithms that are now automated with machine  
74 learning are not as effective, especially considering the large scale of current probes, with waveforms containing over 30 time  
75 points and 384 electrodes simultaneously recording (21) (22). Another method utilized a probabilistic approach through a  
76 Gaussian Process Classifier with a variational Bayesian approach and radial basis function, and achieved 72.5% to 92.7%  
77 accuracy in the univariate classification and up to 99.2% accuracy in twin-variate classification for several rat and cat cells.  
78 However, the accuracy ranged widely in different methods and was only performed for 40-120 neurons, which is not necessarily  
79 sufficient as justification for large-scale classification (23).  
80  
81  
82  
83  
84  
85  
86  
87

88 Research using neural networks in the classification of four types of adult human dentate nucleus neurons saw a misclassification rate of 32.8% to 37.2% using topological data,  
89 and a misclassification rate of just 3.3% using morphological data; while useful, this data is significantly harder to obtain  
90 than electrophysiological data, which merely requires a probe with electrodes inserted into the brain (24). In addition, general  
91 classification of several myenteric neuron types has been shown to require morphological supplementary data to assist  
92 electrophysiological data in classification (25).  
93  
94  
95  
96  
97

98 Thus, it seen that there are several pressing issues with regard to neuron cell classification. Spike sorting is plausible  
99 in conjunction with other identification methods such as optotagging or RNA-seq, but this requires repeated iterations  
100 of these techniques to confirm cluster identification. In addition, clustering methods that use spike sorting algorithms are  
101 time-consuming, which hinders real-time classification. The accuracy of these spike sorting algorithms is often variable and  
102 resulting clusters can be difficult to distinguish, because the algorithm will not definitively assign a cluster or classification  
103  
104  
105  
106  
107

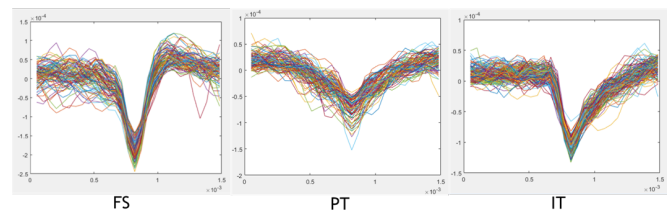

Fig. 1. 150 waveforms of 29 points superimposed to distinguish the waveform shape between the FS, PT, and IT neuron cell type.

108 to each spike waveform. Finally, artificial neural networks as a classification tool are promising, but require or recommend  
109 morphological data in conjunction to electrophysiological data.  
110

111 Currently, neuron classification has been attempted and has seen success with extracellular recordings, both single-channel and multi-channel, in various brain regions including  
112 the primary visual cortex, cortical visual area AM, cortical visual area RL, hippocampus, lateral geniculate nucleus, lateral posterior nucleus, superior colliculus, and cerebellum. The  
113 classification techniques used in classification of neurons from these brain regions includes random forests, K-means clustering, and t-distributed stochastic neighbor embedding (t-SNE)  
114 (13). However, neuron cell classification has not yet been attempted in the anterior lateral motor cortex; in addition, artificial neural networks and various other promising machine  
115 learning algorithms have not been examined.  
116  
117  
118  
119  
120  
121  
122  
123

124 The purpose of this research is to develop an accurate neuron classification method for the anterior lateral motor cortex with single-channel and multi-channel electrophysiological  
125 extracellular recordings via multilayer perceptron neural networks (MPNs), convolutional neural networks (CNN), random forests (RF), K-means clustering, t-SNE, k-nearest neighbors  
126 (KNN), gradient tree boosting (GTB), extra trees (ET), and logistic regression (LR) classification. In the single-channel recordings, the purpose is to distinguish between distinct cell  
127 types, while in the multi-channel recording, the purpose is to distinguish subtypes of a specific cell. In doing this, the effects of classification metrics and hyperparameter tuning on  
128 accuracy is investigated as well.  
129  
130  
131  
132  
133  
134  
135  
136

## 137 Materials and Methods

138 **Single-channel recording.** Single-channel electrophysiological data was the alm-1 dataset obtained from CRCNS (26). Data preprocessing was performed in MatLab R2018 on the spike  
139 waveforms, which were a set of 29 single points that made a waveform when plotted. The L5 IT and PT cells in this dataset were optogenetically tagged with CRE-dependent AAV  
140 virus expressing ChR2, ensuring its ground-truth validity and verifying the set of mathematical analyses. The FS neurons were determined by a spike-sorting methodology due to the  
141 distinctly small time interval between spikes. Despite the lack of optogenetic tagging for these neurons, their identity is still known due to the unambiguous nature - in terms of  
142 fast-spiking compared to regular-firing - of GABAergic neuron spiking. Feature extraction was done as the waveforms were separated by cell type (cell types were FS, PT, & IT); eight  
143 features were calculated (See Appendix A.1 for full code).  
144  
145  
146  
147  
148  
149  
150  
151  
152  
153

154 **Feature extraction & pre-processing.** Figure 1 shows the distinct differences between three cell types found in the motor cortex;  
155

156 however, while they are visually very different, a feature ex- 217  
157 traction methodology is needed to quantify these waveforms 218  
158 to find mathematical patterns. 219

159 The first three features were related to the waveform's 220  
160 amplitude. The first was the full amplitude (fA); it was 221  
161 calculated by the absolute difference between the peak and 222  
162 trough of the waveform (Appendix A.1 Line # 183-187). The 223  
163 second feature was the negative amplitude (nA), calculated as 224  
164 the difference between the trough and 0 (Appendix A.1 Line 225  
165 # 190-193). The third feature was, on the other hand, the 226  
166 positive amplitude (pA), calculated as the difference between 227  
167 the peak and 0 (Appendix A.1 Line # 195-199). 228

168 The fourth and fifth features were related to the width of 229  
169 the waveform. The fourth was the distance from the trough 230  
170 to the first peak following the trough, and was labeled the 231  
171 "recovery time" (rT; Appendix A.1 Line # 202-209). The 232  
172 fifth, alternatively, was the distance from the first peak in the 233  
173 waveform to the trough, and was labeled the "spike time" (sT; 234  
174 Appendix A.1 Line # 212-219). 235

175 The final three features were related to the group of wave- 236  
176 forms within one trial. The sixth feature was the interspike 237  
177 interval (isi), calculated as the time difference between con- 238  
178 secutive spikes (Appendix A.1 Line # 222-234). The seventh 239  
179 feature was the regularity of the spikes (reg), calculated as 240  
180 the variance of the ratio between consecutive interspike in- 241  
181 tervals (Appendix A.1 Line # 237-244). The eighth feature 242  
182 was burstiness (b), which was calculated as the number of 243  
183 interspike intervals that were less than a tenth of the mean 244  
184 interspike interval for a cell type, meaning the cell fired as a 245  
185 burst (Appendix A.1 Line # 248-257). 246

186 In addition to these eight calculated features, the entire 247  
187 waveform of 29 units was appended to form the final 29 features. 248  
188 Before these 29 units were added, the electrical background 249  
189 activity of the brain, or the noise, was base-lined to prevent it 250  
190 interfering with the classifiers (Appendix A.1 Line # 123-126). 251

191 After this preprocessing, the result was three separate ma- 252  
192 trices (FS, PT, IT) with n rows, with n equal to the number of 253  
193 waveforms for a given cell type, and 37 columns, one for each 254  
194 feature. These matrices were transferred to a Python IDE 255  
195 (Jupyter Notebook) for further processing and classification 256  
196 via a .csv file intermediary. 257

197 **Training - testing set creation.** Further processing was performed 258  
198 in Python 3 to create training and testing arrays for the 259  
199 future ANNs and ML algorithms (See Appendix B for full 260  
200 Python code of data processing and train/test set creation). 261  
201 The training data matrix was first filled with the existing 262  
202 data available for each neuron cell type (67% of the available 263  
203 data for each cell type was used in accordance with a 67:33 264  
204 train-to-test split ratio; Appendix B Line # 98-105). Since 265  
205 there was a large discrepancy in the available data for the 266  
206 individual cell types (1,438,775 FS waveforms compared to 267  
207 319,484 and 126,460 PT & IT waveforms), the ANNs and other 268  
208 ML algorithms may have only predicted the FS class for all 269  
209 waveforms. Thus, oversampling was performed to synthesize 270  
210 new data and equalize the training data for each neuron cell 271  
211 type. (Appendix B Line # 129-141). 272

212 After this, all neuron cell types were randomly sorted 273  
213 into master training and testing sets after NaNs were re- 274  
214 moved (Appendix B Line # 144-186). The 29 individual points 275  
215 of the waveform were extremely small values, on the order of 276  
216  $1e^{-4}$  and  $1e^{-5}$ ; the discrepancy between these values and the 277

calculated features would interfere with the classifier, so they 217  
were normalized to values between zero and one (this normal- 218  
ization was performed on the three amplitude calculations as 219  
well; Appendix B Line # 196-197). 220

**Multilayer perceptron neural network.** The MPN was then 221  
trained and tested using PyTorch (See Appendix C for full 222  
Python code of MPN training and testing). Its architecture 223  
consisted of 3 hidden layers, with between 3-37 input nodes, 224  
depending on the feature selection of the trial, and 3 output 225  
nodes for the three classes. Each fully connected layer but 226  
the final one was followed by a rectified linear unit activation 227  
function (ReLU) as well; a log softmax activation function 228  
was performed on the final layer (Appendix C Line # 50-70). 229  
The feature selection variable was informed by the recursive 230  
feature elimination (RFE) algorithm. The set of the best 231  
three features (fA, nA, pA), best four features (fA, nA, pA, 232  
reg), and best five features (fA, nA, pA, reg, isi), along with 233  
all eight features, the 29 points of the waveform, and all 37 234  
features together (Appendix C Line # 29-41) were selected. 235  
The learning rate was set at 0.001, the optimizer function was 236  
stochastic gradient descent with momentum ( $p = 0.9$ ), and 237  
the loss function was CrossEntropyLoss (Appendix C Line 238  
# 76-79). Batch size was set at 100 (Appendix C Line # 239  
101). Epoch number was variable to determine the minimum 240  
training needed to plateau accuracy and evaluate the speed at 241  
which the network learned; it was tested at 1, 2, 3, 5, 10, 25, 242  
50, and 100 epochs. 243

**Convolutional neural network.** The CNN was created and 244  
tested in PyTorch as well (See Appendix D for full Python 245  
code of CNN training and testing). Its network architecture 246  
consisted of 2 1-D convolutions, each of which was followed 247  
by a ReLU activation function and a 1-D pooling layer, and 248  
2 fully-connected hidden layers. Each fully-connected hidden 249  
layer was followed by a ReLU activation function, and the 250  
final layer was followed by a log softmax activation function 251  
(Appendix D Line # 50-81). The feature selection, learning 252  
rate, optimizer function, loss function, and batch size were 253  
identical to the MPN. In addition, epoch number was varied 254  
identically. 255

**Machine learning algorithms.** Seven additional ML algorithms 256  
were tested; three that were performed in existing literature 257  
in eight other regions of the brain (RF, k-means, and t-SNE). 258  
Four additional ones (KNN, GTB, ET, & LR) were promising 259  
and were tested as well (See Appendix E for full Python code 260  
of additional ML algorithms; all additional ML algorithms 261  
used Scikit-learn in Python). 262

The random forests algorithm, essentially swarm intelli- 263  
gence with decision trees, was performed. The number of 264  
decision trees was varied; 100, 500, and 1000 were tested. In 265  
addition, the number of maximum features were varied as well; 266  
3, 4, 5, and 8 randomized features from the 8 calculated fea- 267  
tures, all 29 points of the waveform, and all 37 total attributes 268  
were considered (Appendix E Line # 36-64). 269

K-means clustering was performed, varying the number of 270  
times the algorithm is run with different centroid seeds (10 & 271  
25) and the maximum number of iterations of the algorithm for 272  
a single run, from 300 to 700 with a step size of 200. (Appendix 273  
E Line # 65-93). 274



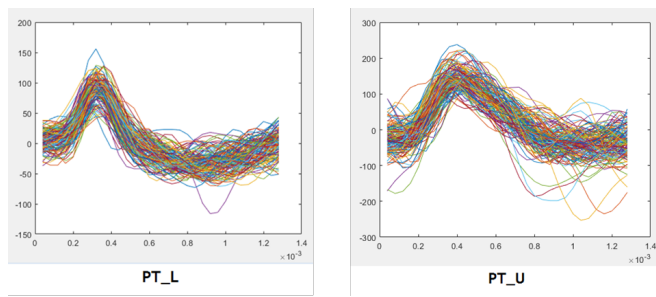

**Fig. 2.** 150 waveforms of 29 points superimposed to distinguish the waveform shape between the PT\_L & PT\_U neuron cell type.

due to the nature of the provided dataset (Appendix A.2 Line # 122-213; Appendix A.3 Line # 141-232).

The final 3 features were the calculated channel of the neuron, the shank in which it was measured, and the time index at which it was detected (Appendix A.2 Line # 90-96; Appendix A.3 Line # 107-115).

In addition to these 11 calculated features, the entire waveform of 32 units was appended to form the final 32 features. (Appendix A.2 Line # 97-99; Appendix A.3 Line # 116-118).

After this preprocessing, the result was two separate matrices (L & U) with  $n$  rows, with  $n$  equal to the number of waveforms for a given cell type, and 44 columns, one for each feature (excluding the first, which was the label). These matrices were transferred to a Python IDE (Jupyter Notebook) for further processing and classification via a .csv file intermediary.

**Training - testing set creation.** Further processing was performed in Python 3 to create training and testing arrays in an identical manner to the single-channel recording (See Appendix B for full Python code).

**MPN & CNN.** MPN & CNN were then trained and tested using PyTorch in an identical manner (See Appendix C & D for full Python code of MPN & CNN training and testing).

**ML algorithms.** Seven additional machine learning algorithms were tested identically as well (See Appendix E for full Python code of additional ML algorithms).

## Results

See Appendix F Tables S1 - S3 & Figs. S1 - S18 and Appendix G Tables S4 - S6 & Figs. S19 - S36 for complete data and graphical figures from the MPN, CNN, and other ML algorithms for both single-channel and multi-channel recordings (excluding t-SNE and K-means).

**Single-channel recordings - ANNs.** See Figs. S1 - S12 for accuracy and variance plotted as a function of epoch set (1, 2, 3, 5, 10, 25, 50, & 100 epochs). Each figure was initialized to 33% accuracy, to represent a random untrained classifier, since there were three possible classes, along with a maximum variance of 250,000.

In Figures 3 & 4, for the 3 feature subset in both the MPN and CNN, accuracy rose to 70-72% and plateaued after 5 epochs for the MPN and 3 epochs for the CNN. This epochs of convergence is a measure of the speed in which the classifier learned to achieve a consistent accuracy and is indicated by the color of the bars. Variance dropped to nearly 0 as accuracy plateaued for both networks, indicating they were consistently accurate.

For the 4 feature subset, accuracy and variance behaved nearly identically, plateauing after the same number of epochs for both the MPN and CNN. For 5 features, accuracy initially rose but then dropped off as epochs reached 100, and variance shot up to 200,000 for both networks. Even when accuracy was at its highest and variance was at its lowest, indicating some reliability at 3 epochs, the accuracy did not exceed 67-73%.

In the 8 feature subset, the networks behaved very differently. Figure 3 shows the MPN, with an accuracy of 55% but extremely high variance indicated by the error bars. Thus, it was unreliable despite decent accuracy. In contrast, Figure 4

Hyperparameter tuning for t-SNE included varying perplexity, learning rate, and the maximum optimization iterations. The algorithm was run for perplexity values of 25, 50, 100, and 200; learning rate values of 200, 500, and 750; and maximum optimization iterations of 300, 500, and 1000 (Appendix E Line # 94-127).

K-nearest neighbors consisted of varying the number of neighbors from 3, to 5, to 10 (Appendix E Line # 128-154).

In gradient tree boosting, 100, 500, and 1000 decision trees were varied, while the learning rate was kept constant at 0.1 (Appendix E Line # 155-181).

For the extra trees algorithm, the number of trees was varied from 100, to 500, to 1000 trees (Appendix E Line # 182-208).

Finally, in the logistic regression classification, regularization strength (C) was varied from 1, to 1.5, to 2 (Appendix E Line # 209-235). In all previous algorithms but the random forests, 8 calculated features, the 29 waveform points, and all 37 features were varied as well.

**Multi-channel recording.** Multi-channel electrophysiological data was a dataset obtained from Dr. Michael Economo of the Janelia Research Campus (27). The PT\_U and PT\_L neurons in this dataset were optogenetically tagged to ensure the validity of their classification in a similar manner to the single-channel recording; thus, the specific types of neurons classified were known, again ensuring the mathematical classification's validity. Data preprocessing was performed in MatLab R2018 on the spike waveforms, which were a set of 124 to 256 single points that made a waveform when plotted (See Appendix A.2 and A.3 for full code). Each subset of 32 points was a separate waveform from a specific channel; thus, each plotted waveform of 124-256 points was actually 4-8 spikes on neighboring channels at a time point. Thus, prior to feature extraction, the 32-point waveform with maximum amplitude was extracted from the set of 4-8 waveforms, as it provided the most information about the given neuron (Appendix A.2 Line # 106-120; Appendix A.3 Line # 125-139). Feature extraction was done after the largest waveforms were extracted; 11 features were calculated.

**Feature extraction & pre-processing.** Figure 2 shows the two subtypes of PT neurons, PT\_L and PT\_U; it is seen that the waveforms look extremely similar; thus, feature extraction is needed to find differences between the cell types mathematically.

The first eight features were calculated identically to the single-channel dataset, with appropriate adjustments made

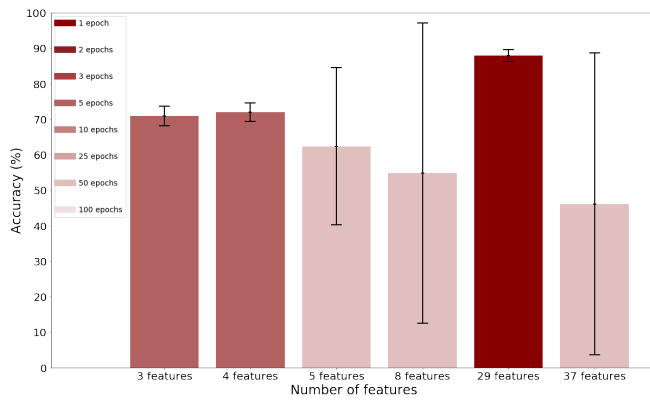

**Fig. 3.** Mean accuracy of MPN as a function of feature subsets, with the black error bars representing variance of the network and the color of the bars represent the epochs of convergence as per the legend

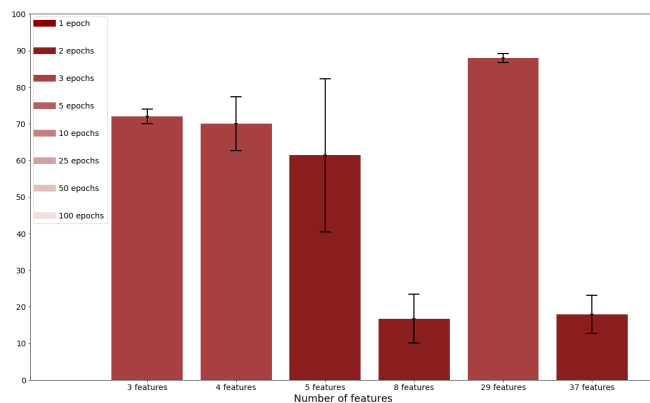

**Fig. 4.** Mean accuracy of the CNN as a function of feature subsets, with the black error bars representing variance of the network and the color of the bars represent the epochs of convergence as per the legend

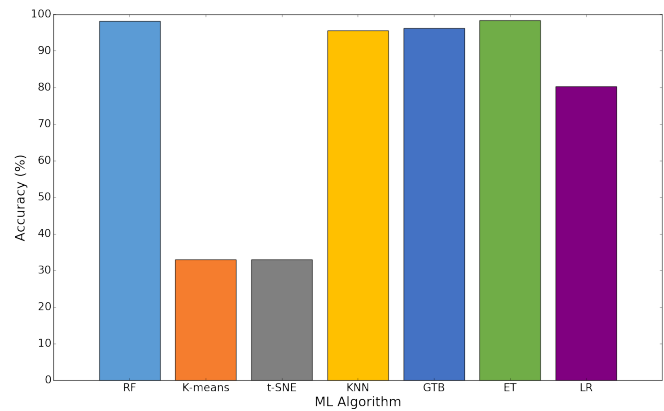

**Fig. 5.** Maximum mean accuracy of various ML algorithms

**Random forests.** Random forests performed extremely well in classifying the FS, PT, and IT waveforms (see Figure 5). For 3 maximum features, a mean accuracy of 90.5% was seen, which decreased as more calculated features were added; 4 features yielded 89.1%, 5 features yielded 88.1%, and 8 features yielded 87.5%. When all 29 points of the waveform were used by the random forest, a mean accuracy of 98.1% was achieved, which decreased to 95.0% when all 37 attributes were used. Finally, the RF algorithm achieved maximum accuracy at 100 decision trees, with no significant difference between 100, 500, and 1000 trees, allowing for more rapid training.

**K-means clustering.** The k-means clustering was completely inaccurate, yielding accuracies of no greater than random guessing (33%); this occurred for all hyperparameters and feature subsets. It is likely that this poor clustering is because the spikes, though different visually, are difficult to distinguish by the clustering algorithm due to perceived similarities. In addition, there are likely enough anomalies with skewed spike waveforms such that the remaining waveforms cannot be reasonably classified.

**t-SNE clustering.** The t-SNE clustering yielded an image file in which each neuron cell type was assigned a color; green corresponded to FS, blue to PT, and red to IT. Fig. S14 is an example t-SNE clustering output file; all other iterations of t-SNE clustering yielded a nearly identical cluster. The clustering shows that t-SNE is essentially random (33%), likely for a similar reason as K-means clustering.

**K-nearest neighbors.** K-nearest neighbors performed extremely well in classifying the FS, PT, and IT waveforms (see Figure 5). For 8 features, a mean accuracy of 83.8% was seen. When all 29 points of the raw waveform were used by the KNN algorithm, a mean accuracy of 96.2% was achieved, which then decreased back to 83.9% when all 37 attributes were used. The number of neighbors in the KNN algorithm was varied, showing some difference between the 3, 5, and 10 neighbors and indicating that 3 neighbors worked best, since there were 3 classes for the neurons in the ground-truth data.

**Gradient tree boosting.** Gradient tree boosting performed fairly well in classifying the waveforms (see Figure 5). For 8 features, a mean accuracy of 87.8% was seen. When all 29 points of the waveform were used by the GTB algorithm, the mean accuracy decreased to 85.9%, which followed an opposite pattern from

shows the CNN with an incredibly low accuracy of 16%, worse than random guessing, even as variance was low; therefore, the CNN was consistently poor. While the networks did behave differently, they provided similar results: the trend towards poorer performance as more calculated features are added suggests the features become increasingly ambiguous between cell types.

Figures 3 & 4 show promising results from both the MPN and CNN with 29 features. With convergence at just 3 epochs, both networks shot up to 88-89% as variance dropped to nearly 0.

The networks behaved similarly for all 37 attributes as they did for the 8 calculated features; for the MPN, accuracy was 46%, while variance remained extremely high. For the CNN, accuracy again dropped below random guessing to 18% with low variance. This poor performance as the eight calculated features were added again indicates the feature calculation was not rigorous, or were potentially not selected ideally. This is especially possible in waveforms with different, unique spike shapes that may have thrown off the feature extraction.

**Single-channel recordings - ML algorithms.** See Figs. S13 - S18 for detailed graphics of performance as a function of the variable hyperparameters.

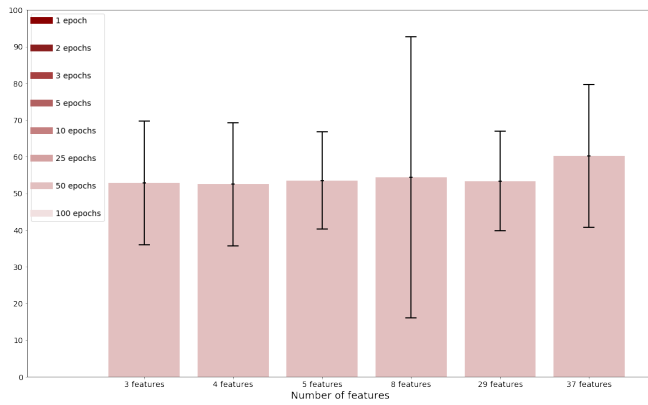

**Fig. 6.** Mean accuracy of MPN as a function of feature subsets, with the black error bars representing variance of the network and the color of the bars represent the epochs of convergence as per the legend

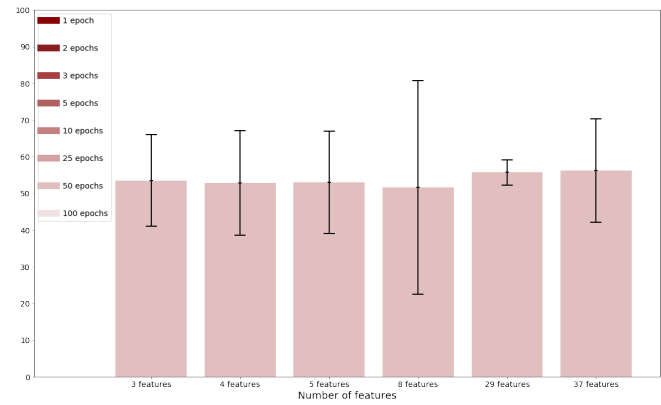

**Fig. 7.** Mean accuracy of CNN as a function of feature subsets, with the black error bars representing variance of the network and the color of the bars represent the epochs of convergence as per the legend

443 the previous algorithms. Interestingly, with all 37 attributes, 444 the mean accuracy shot up to 95.5%, revealing a different set 445 of results than previously seen. The variation in the number 446 of trees in the GTB algorithm showed some difference between 447 the 100, 500, and 1000 trees and indicated that 100 trees 448 worked best.

449 **Extra trees.** The extra trees classifier performed the best in 450 classifying the waveforms (see Figure 5). For 8 features, a 451 mean accuracy of 92.1% was seen. When all 29 points of the 452 waveform were used by the algorithm, a mean accuracy of 98.3% 453 was achieved, which then decreased slightly to 97.0% 454 when all 37 attributes were used. Although the number of trees 455 in the classifier was varied, there was no significant difference; 456 100 trees is ideal.

457 **Logistic regression.** Finally, logistic regression performed the 458 worst of the non-clustering algorithms in classifying the 459 waveforms, exhibiting a maximum accuracy of 83.0% with 460 29 features. Although the inverse regularization strength in 461 the classifier was varied, there was no significant difference 462 between 1, 1.5, and 2.

463 Of the ML algorithms tested, RF, KNN, GTB, and 464 ET classification yielded an accuracy of >95% compared to 465 the neural networks, which plateaued at 88-91%. In addition, 466 excluding the GTB algorithm, the 29 points of the raw 467 waveform worked best for all other ML algorithms, while the 468 calculated features threw off the classifiers. 469

470 **Multi-channel recordings - ANNs.** The classification in the 471 multi-channel recordings was significantly more difficult than 472 in single-channel recordings, due to the similarity between 473 the two waveforms in question (Figure 2). However, effective 474 classification with reasonable accuracy of these neuron cell 475 types is invaluable in large-scale classification, as it would 476 allow for the classification of neuron subtypes within a specific 477 neuron type, to provide a better picture of neural circuitry 478 and more specific relationships between neurons and behavior.

479 See Figs. S19 - S30 for accuracy and variance plotted as a 480 function of epoch set (1, 2, 3, 5, 10, 25, 50, & 100 epochs). Each 481 figure is initialized to 50% accuracy to represent a random 482 untrained classifier, since there were two possible classes, with 483 a maximum variance of 70,000.

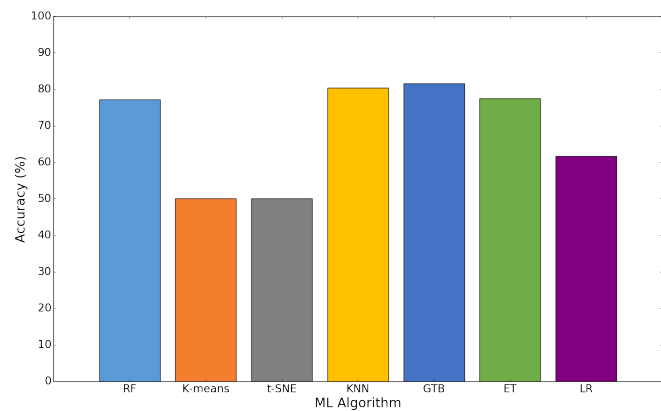

**Fig. 8.** Maximum mean accuracy of various ML algorithms

484 Interestingly, seen in Figures 6 and 7, the ANNs did not 485 perform nearly as well for these recordings; this was likely 486 due to the aforementioned large similarity between the two 487 neuron cell types being classified. The accuracy, despite feature 488 selection or epochs for training, hovered around 50%, never 489 exceeding 68%, which was largely an anomaly. The relatively 490 high and inconsistent variance across feature sets and epochs 491 made any accuracy above 50% unreliable, and the networks 492 took 50-100 epochs to converge, indicating it trained slowly, if 493 at all.

494 **Multi-channel recordings - ML algorithms.** See Figs. S31 - S36 495 for detailed graphics of performance as a function of the vari- 496 able hyperparameters.

497 **Random forests.** Random forests performed fairly well in clas- 498 sifying the PT\_L & PT\_U waveforms (see Figure 8). For 3 499 maximum features, a mean accuracy of 75.5% was seen; 4 500 features yielded 76.1%, 5 features yielded 76.9%, and 8 features 501 yielded 77.2%. When all 32 points of the waveform were used 502 by the random forest, the mean accuracy actually decreased to 503 73.1%, which then increased to 75.2% with all 43 attributes. 504 Although the number of trees in the random forest algorithm 505 was varied, there was no significant difference between 100, 506 500, and 1000 trees; again, 100 trees is ideal.

507 **K-means clustering.** The k-means clustering was completely inac- 565  
508 curate, yielding accuracies of no greater than random guessing 566  
509 (50%) for all hyperparameters and feature subsets. This is 567  
510 again because the spikes, though different visually, are diffi- 568  
511 cult to distinguish by the clustering algorithm due to some 569  
512 perceived similarities. In addition, there are likely enough  
513 anomalies in the dataset with skewed spike waveforms such  
514 that the remaining waveforms cannot be reasonably classified.

515 **t-SNE clustering.** The t-SNE clustering yielded an image file 571  
516 in which each neuron cell type was assigned a color; green 572  
517 corresponded to PT\_L, while red corresponded to PT\_U. 573  
518 Fig. 32 is an example t-SNE clustering output file; all other 574  
519 iterations of t-SNE clustering with different feature selection 575  
520 and other hyperparameter tuning yielded a nearly identical 576  
521 cluster as shown. The clustering shows that t-SNE is random 577  
522 (33%), and cannot be effectively used to classify these neuron 578  
523 cell types, likely for a similar reason as K-means clustering. 579

524 **K-nearest neighbors.** K-nearest neighbors performed the best in 581  
525 classifying the waveforms (see Figure 8). For 8 features, a 582  
526 mean accuracy of 81.6% was seen. When all 32 points of the 583  
527 raw waveform were used by the algorithm, a mean accuracy of 584  
528 68.5% was achieved, which then increased to 75.4% when all 585  
529 43 attributes were used. Although the number of neighbors 586  
530 in the KNN algorithm was varied, there was no significant 587  
531 difference between the 3, 5, and 10 neighbors; 3 is ideal since 588  
532 it is closest to the number of classes in the ground-truth data. 589

533 **Gradient tree boosting.** Gradient tree boosting performed fairly 591  
534 well in classifying the waveforms. For 8 features, a mean 592  
535 accuracy of 78.4% was seen. When all 32 points of the raw 593  
536 waveform were used by the GTB algorithm, the mean accuracy 594  
537 decreased to 66.7%, and with all 43 attributes, the mean 595  
538 accuracy increased to 73.1%. The number of trees in the 596  
539 GTB algorithm was varied, showing some difference primarily 597  
540 between the 100 trees and 500-1000 trees. In this case, accuracy 598  
541 increased significantly by 2-6% when 500 and 1000 trees; thus, 599  
542 500 trees are ideal. This increase in optimal decision trees is 600  
543 likely due to the difficulty in classifying the waveforms. 601

544 **Extra trees.** The extra trees classifier performed fairly well in 603  
545 classifying the waveforms as well (see Figure 8). For 8 features, 604  
546 a mean accuracy of 77.4% was seen. When all 32 points of 605  
547 the waveform were used by the algorithm, a mean accuracy of 606  
548 73.5% was achieved, which then increased slightly to 75.4% 607  
549 when all 43 attributes were used. Although the number of trees 608  
550 in the classifier was varied, there was no significant difference 609  
551 between the 100, 500, 1000, & 1500 trees; 100 trees is ideal 610  
552 for maximizing speed. 611

553 **Logistic regression.** Finally, logistic regression again performed 613  
554 the worst of the non-clustering algorithms in classifying the 614  
555 waveforms. For 8 features, a mean accuracy of 61.7% was 615  
556 seen. When all 32 raw points of the waveform were used 616  
557 by the algorithm, a mean accuracy of 56.2% was achieved, 617  
558 which then increased slightly to 59.0% when all 43 attributes 618  
559 were used. The inverse regularization strength (IRS) in the 619  
560 classifier was varied, with some difference between the 1, 1.5, 620  
561 and 2; an IRS of 1 performed best. 621

562  
563 Of the ML algorithms tested, RF and ET classifica- 622  
564 tion yielded an accuracy of >75%, while KNN and GTB 623  
624

performed at >80% accuracy. The ANNs, in comparison, 565  
were about 52% accurate on average. In contrast to the 566  
single-channel recordings, the 8 calculated features worked 567  
best for all ML algorithms, while the raw waveform threw off 568  
the classifiers. 569

## 570 Discussion

In the single-channel recording in which ANNs were used, the 571  
initial selection of features (top 3 and 4 features) and all 29 572  
raw waveform points performed most reliably and accurately. 573  
This implies that the remaining 4-5 calculated features were 574  
not necessarily dependent on cell type, and may change in 575  
certain cells. Thus, these features introduced ambiguity to the 576  
classifiers, resulting in high variances and mediocre accuracy, 577  
or low variances but low accuracy, making the feature subsets 578  
unusable for classification. In addition, the highest and most 579  
consistent accuracy was seen with the pure waveform alone 580  
(88-91% accuracy), indicating that the networks were most 581  
adept at selecting and extracting the appropriate features for 582  
classification autonomously. This largely eliminates the need 583  
for time-consuming data processing and feature extraction. 584

Training for acceptable accuracy and variance requires no 585  
more than 10 epochs for both networks, or 50 epochs for 586  
maximum accuracy and minimum variance, both of which 587  
can be done within 24-72 hours. After this, running even 588  
hundreds of thousands of waveforms through the network, 589  
in the case of high density extracellular probes, produces a 590  
reliable classification within seconds and can allow for near 591  
real-time large-scale classification. 592

For the single-channel recordings in which the ML algo- 593  
rithms was used, a maximum accuracy of 98% is seen with 594  
other ML algorithms. The ideal machine learning algorithm is 595  
extra trees due to its consistency and high performance across 596  
feature sets; however, random forests, k-nearest neighbors, 597  
and gradient tree boosting perform comparably. 598

For the multi-channel recordings in which the ANNs were 599  
used for classification, the high similarity between the neuron 600  
subtype waveforms had a large effect on the accuracy. It is 601  
seen that ANNs are neither an accurate nor precise method for 602  
classifying specific neuron cell subtypes on a large scale, with 603  
a maximum accuracy of 68% regardless network architecture. 604  
However, when the assorted ML algorithms are applied, a 605  
maximum accuracy of 81.6% is seen. The ideal ML algorithm 606  
is KNN due to its high performance with the 8 calculated 607  
feature set. In addition, gradient tree boosting, random forests, 608  
and the extra trees algorithm perform comparably. 609

The results given above are validated by the use of op- 610  
togenetic tagging in the datasets that these analyses were 611  
performed on, as the true identity of the neurons that were 612  
classified was known. Thus, to distinguish between different 613  
neuron cell types in the motor cortex, both neural networks 614  
and specific machine learning algorithms allow for accurate and 615  
consistent classification. In addition, to distinguish between 616  
specific neuron cell subtypes in the motor cortex, neural net- 617  
works are not a viable solution, but specific machine learning 618  
algorithms accurately facilitate this large-scale classification. 619

In comparison to the current broad range of spike sorting 620  
methods, many of which are specifically built for high-density 621  
electrical probes, ANNs and ML algorithms classify neurons 622  
at a much greater rate and with consistently high accuracy. 623  
They only require 1 iteration of a bio-imaging technique, while 624



625 other classification methods require some bio-imaging for every  
626 iteration of clustering, to provide ground-truth data for specific  
627 neurons in a brain region. Finally, they can accurately classify  
628 these neurons without the ambiguity that often results from  
629 spike sorting clustering methods. This research reveals a novel,  
630 reproducible method for enabling extremely rapid, near real-  
631 time large-scale classification at a relatively high accuracy,  
632 with widespread applications in all regions of the brain to  
633 better understand the connections between neural circuitry  
634 and behavior.

635 **ACKNOWLEDGMENTS.** The author received funding from the  
636 Janelia Research Campus of the Howard Hughes Medical Institute.  
637 The author would like to thank Dr. Louis Scheffer, Dr. Marius  
638 Pachitariu, & Dr. Michael Economo for providing the guidance,  
639 materials, and expertise needed to conduct this research.

- 640 1. Jun JJ, et al. (2017) Fully integrated silicon probes for high-density recording of neural activity.  
641 *Nature* 551:232–236.
- 642 2. Li N, Chen T, Guo ZV, Gerfen CR, Svoboda K (2015) A motor cortex circuit for motor planning  
643 and movement. *Nature* 519:51–56.
- 644 3. Pachitariu M, Steinmetz NA, Kadir S, Carandini M, Harris K (2016) Kilosort: Realtime spike-  
645 sorting for extracellular electrophysiology with hundreds of channels. *BioRxiv*.
- 646 4. Rossant C, et al. (2016) Spike sorting for large, dense electrode arrays. *Nature Neuroscience*  
647 19:634–641.
- 648 5. Jun JJ, et al. (2017) Real-time spike sorting platform for high-density extracellular probes with  
649 ground-truth validation and drift correction. *BioRxiv*.
- 650 6. Yuan Y, Yang C, Si J (2012) The m-sorter: An automatic and robust spike detection and  
651 classification system. *Journal of Neuroscience Methods* 210:281–290.
- 652 7. Lee J, et al. (2017) Yass: Yet another spike sorter. *BioRxiv*.
- 653 8. Chung JE, et al. (2017) A fully automated approach to spike sorting. *Neuron* 95:1381–1394.
- 654 9. Yger P, et al. (2018) A spike sorting toolbox for up to thousands of electrodes validated with  
655 ground truth recordings in vitro and in vivo. *eLife* 7:e34518.
- 656 10. Dhawale AK, et al. (2017) Automated long-term recording and analysis of neural activity in  
657 behaving animals. *eLife* 6:e27702.
- 658 11. Ray HG, Pedreira C, Quiroga RQ (2015) Past, present and future of spike sorting techniques.  
659 *Brain Research Bulletin* 119:106–117.
- 660 12. Lewicki MS (1998) A review of methods for spike sorting: the detection and classification of  
661 neural action potentials. *Network: Computation in Neural Systems* 9:R53–R78.
- 662 13. Jia X, et al. (2018) High-density extracellular probes reveal dendritic backpropagation and  
663 facilitate neuron classification. *BioRxiv*.
- 664 14. Usoskin D, et al. (2015) Unbiased classification of sensory neuron types by large-scale single-  
665 cell rna sequencing. *Nature Neuroscience* 18:145–153.
- 666 15. Armstrong WE (1995) Morphological and electrophysiological classification of hypothalamic  
667 supraoptic neurons. *Progress in Neurobiology* 47:291–339.
- 668 16. Xie C, Lin Z, Hanson L, Cui Y, Cui B (2012) Intracellular recording of action potentials by  
669 nanopillar electroporation. *Nature Nanotechnology* 7:185–190.
- 670 17. Mensi S, et al. (2012) Parameter extraction and classification of three cortical neuron types  
671 reveals two distinct adaptation mechanisms. *Journal of Neurophysiology* 107:1756–1775.
- 672 18. Villiere V, McLachlan EM (1996) Electrophysiological properties of neurons in intact rat dor-  
673 sal root ganglia classified by conduction velocity and action potential duration. *Journal of*  
674 *Neurophysiology* 76:1924–1941.
- 675 19. Nowak LG, Azouz R, Sanchez-Vives MV, Gray CM, McCormick DA (2003) Electrophysiological  
676 classes of cat primary visual cortical neurons in vivo as revealed by quantitative analyses.  
677 *Journal of Neurophysiology* 89:1541–1566.
- 678 20. Fuzik J, et al. (2016) Integration of electrophysiological recordings with single-cell rna-seq  
679 data identifies neuronal subtypes. *Nature Biotechnology* 34:175–183.
- 680 21. Salganicoff M, Sarna M, Sax L, Gerstein GL (1988) Unsupervised waveform classification for  
681 multi-neuron recordings: a real-time, software-based system. i. algorithms and implementa-  
682 tion. *Journal of Neuroscience Methods* 25:181–187.
- 683 22. Sarna M, Gochin P, Kaltenbach J, Salganicoff M, Gerstein GL (1988) Unsupervised waveform  
684 classification for multi-neuron recordings: a real-time, software-based system. ii. performance  
685 comparison to other sorters. *Journal of Neuroscience Methods* 25:189–196.
- 686 23. Dijck GV, et al. (2013) Probabilistic identification of cerebellar cortical neurones across  
687 species. *PLoS ONE* 8:e57669.
- 688 24. Grbatinic I, Maric DL, Milosevic NT (2015) Neurons from the adult human dentate nucleus:  
689 Neural networks in the neuron classification. *Journal of Theoretical Biology* 370:11–20.
- 690 25. Bornstein JC, Furness JB, Kunze WAA (1994) Electrophysiological characterization of myen-  
691 teric neurons: how do classification schemes relate? *Journal of the Autonomic Nervous*  
692 *System* 48:1–15.
- 693 26. Li N, Gerfen CR, Svoboda K (2014) Extracellular recordings from anterior lateral motor cortex  
694 (alm) neurons of adult mice performing a tactile decision behavior. *CRCNS.org*.
- 695 27. Economo MN, et al. (2018) Distinct descending motor cortex pathways and their roles in  
696 movement. *Nature* (In press).
